# Supplementary material for: Identification and validation of m6A RNA methylation and ferroptosis-related biomarkers in sepsis: transcriptome combined with single-cell RNA sequencing
Source: Front Immunol. 2025 Mar 7;16:1543517. doi: 10.3389/fimmu.2025.1543517 (PMC11925765; doi:10.3389/fimmu.2025.1543517)
Supplement: Supplementary Table 6 — GSEA identified the enriched pathway of TXN and DPP4. [file Table6.xlsx]

## Sheet: TXN
	ID	Description	setSize	enrichmentScore	NES	pvalue	p.adjust	qvalue	rank	leading_edge	core_enrichment
Oxidative phosphorylation	Oxidative phosphorylation	Oxidative phosphorylation	99	0.497266	2.37032	1.66778e-09	1.66778e-09	2.35245e-07	1282	tags=35%, list=12%, signal=31%	NDUFB3/NDUFA1/COX7B/NDUFB1/ATP5PF/NDUFA4/COX7A2/ATP6V1C1/COX17/UQCRQ/UQCR11/ATP5F1E/ATP5F1C/COX6A1/UQCRB/ATP6V1D/NDUFA6/ATP6V0E1/NDUFS4/NDUFS5/PPA2/COX7C/ATP5MG/ATP5MF/COX6C/UQCR10/ATP6V1E1/NDUFA2/ATP5PD/COX5B/UQCRHL/ATP5ME/NDUFV2/SDHC/NDUFB9
Spliceosome	Spliceosome	Spliceosome	115	-0.490174	-2.0687	6.24754e-08	6.24754e-08	3.09886e-06	2046	tags=48%, list=19%, signal=39%	ACIN1/CTNNBL1/SNRPC/HNRNPA1L2/TRA2A/DHX8/HNRNPM/SNRPA/PRPF6/SNW1/HNRNPC/SRSF3/USP39/RBM25/SRSF10/LSM4/HNRNPK/PPIE/DDX5/SF3B3/PPIH/SRSF7/DDX46/SNRPA1/EFTUD2/SRSF6/PRPF31/PRPF4/RBM22/DHX15/SNRNP70/THOC2/DHX38/SF3B2/CHERP/PCBP1/THOC1/SNRNP200/SNRPB/NCBP2/EIF4A3/SF3A3/HNRNPA1/SRSF5/TCERG1/SNU13/HNRNPA3/PUF60/SRSF4/WBP11/SF3A1/HNRNPU/PRPF19/PRPF8/U2AF2
Antigen processing and presentation	Antigen processing and presentation	Antigen processing and presentation	51	-0.616895	-2.29871	6.59086e-08	6.59086e-08	3.09886e-06	2922	tags=67%, list=27%, signal=49%	KLRC3/HLA-C/HLA-DRB5/KLRC1/HSPA5/HLA-DQB1/TAP1/CANX/HLA-E/RFXAP/TAP2/CTSS/HLA-DOB/HLA-A/HLA-B/CD8B/HLA-F/PSME1/CREB1/KLRD1/HSP90AB1/CD8A/HLA-DQA1/CD4/HLA-DRA/PDIA3/RFX5/HLA-DOA/HLA-DMA/HLA-DMB/HLA-DRB1/HLA-DPA1/HLA-DPB1/CD74
Graft-versus-host disease	Graft-versus-host disease	Graft-versus-host disease	28	-0.693623	-2.24879	6.06228e-07	6.06228e-07	1.7714e-05	2827	tags=82%, list=26%, signal=61%	HLA-C/HLA-DRB5/KLRC1/HLA-DQB1/HLA-E/GZMB/HLA-DOB/HLA-A/HLA-B/FASLG/CD86/HLA-F/KLRD1/HLA-DQA1/PRF1/CD28/HLA-DRA/HLA-DOA/HLA-DMA/HLA-DMB/HLA-DRB1/HLA-DPA1/HLA-DPB1
Alzheimer's disease	Alzheimer's disease	Alzheimer's disease	131	0.398445	2.00524	6.27923e-07	6.27923e-07	1.7714e-05	2055	tags=35%, list=19%, signal=29%	NDUFB3/NDUFA1/COX7B/NDUFB1/ATP5PF/NDUFA4/COX7A2/UQCRQ/UQCR11/ATP5F1E/ATP5F1C/COX6A1/UQCRB/NDUFA6/NDUFS4/NDUFS5/COX7C/COX6C/GAPDH/UQCR10/CASP3/FADD/NDUFA2/APAF1/GNAQ/BAD/ATP5PD/COX5B/ATF6/UQCRHL/NDUFV2/SDHC/NDUFB9/ADAM10/CAPN1/ATP5PO/PPP3CB/MAPK3/NDUFB7/NDUFA7/CDK5/COX6B1/UQCRFS1/COX6B2/PSEN1/ITPR2
Parkinson's disease	Parkinson's disease	Parkinson's disease	94	0.428965	2.02284	4.47365e-06	4.47365e-06	0.00010517	1452	tags=34%, list=13%, signal=30%	NDUFB3/NDUFA1/COX7B/NDUFB1/ATP5PF/NDUFA4/COX7A2/UQCRQ/UQCR11/ATP5F1E/ATP5F1C/COX6A1/UQCRB/NDUFA6/NDUFS4/NDUFS5/UBE2J1/COX7C/COX6C/UQCR10/CASP3/NDUFA2/APAF1/HTRA2/ATP5PD/COX5B/UQCRHL/NDUFV2/SDHC/NDUFB9/UBE2L3/ATP5PO
Autoimmune thyroid disease	Autoimmune thyroid disease	Autoimmune thyroid disease	27	-0.673667	-2.16438	5.66444e-06	5.66444e-06	0.000112469	2827	tags=89%, list=26%, signal=66%	HLA-C/HLA-DRB5/CTLA4/HLA-DQB1/HLA-E/CD40/GZMB/CD40LG/HLA-DOB/HLA-A/HLA-B/FASLG/CD86/HLA-F/HLA-DQA1/PRF1/CD28/HLA-DRA/HLA-DOA/HLA-DMA/HLA-DMB/HLA-DRB1/HLA-DPA1/HLA-DPB1
Allograft rejection	Allograft rejection	Allograft rejection	27	-0.672011	-2.15905	6.37885e-06	6.37885e-06	0.000112469	2827	tags=85%, list=26%, signal=63%	HLA-C/HLA-DRB5/HLA-DQB1/HLA-E/CD40/GZMB/CD40LG/HLA-DOB/HLA-A/HLA-B/FASLG/CD86/HLA-F/HLA-DQA1/PRF1/CD28/HLA-DRA/HLA-DOA/HLA-DMA/HLA-DMB/HLA-DRB1/HLA-DPA1/HLA-DPB1
Type I diabetes mellitus	Type I diabetes mellitus	Type I diabetes mellitus	29	-0.654342	-2.14739	7.47945e-06	7.47945e-06	0.000117222	2827	tags=76%, list=26%, signal=56%	HLA-C/HLA-DRB5/HLA-DQB1/HLA-E/GZMB/HSPD1/HLA-DOB/HLA-A/HLA-B/FASLG/CD86/HLA-F/HLA-DQA1/PRF1/CD28/HLA-DRA/HLA-DOA/HLA-DMA/HLA-DMB/HLA-DRB1/HLA-DPA1/HLA-DPB1
T cell receptor signaling pathway	T cell receptor signaling pathway	T cell receptor signaling pathway	96	-0.445074	-1.83056	2.81684e-05	2.81684e-05	0.000397322	3319	tags=56%, list=31%, signal=39%	JUN/GRB2/AKT2/NCK2/GSK3B/MALT1/FOS/ICOS/NFKB1/CBL/NFAT5/CTLA4/SOS1/PAK1/MAP2K1/MAP2K7/CDK4/PTPN6/AKT3/MAPK1/NFKBIE/CD40LG/PDPK1/PIK3CD/AKT1/CD3D/LCP2/CD8B/RELA/PIK3R1/PIK3R5/VAV2/NFATC1/CD8A/CBLB/CARD11/CD28/PPP3CC/CD3G/MAP3K14/CD4/IKBKB/LAT/ITK/RASGRP1/PLCG1/CD3E/CD247/NFATC2/ZAP70/LCK/NFATC3/PRKCQ/FYN
Intestinal immune network for IgA production	Intestinal immune network for IgA production	Intestinal immune network for IgA production	33	-0.600723	-2.0424	4.68188e-05	4.68188e-05	0.000600355	677	tags=39%, list=6%, signal=37%	HLA-DQA1/CD28/CXCR4/MAP3K14/ITGA4/HLA-DRA/ITGB7/HLA-DOA/HLA-DMA/HLA-DMB/HLA-DRB1/HLA-DPA1/HLA-DPB1
Huntington's disease	Huntington's disease	Huntington's disease	144	0.342513	1.76631	6.56364e-05	6.56364e-05	0.000757502	1722	tags=29%, list=16%, signal=25%	NDUFB3/NDUFA1/COX7B/NDUFB1/ATP5PF/NDUFA4/COX7A2/UQCRQ/UQCR11/ATP5F1E/ATP5F1C/COX6A1/UQCRB/HIP1/NDUFA6/NDUFS4/NDUFS5/COX7C/POLR2K/COX6C/DCTN4/UQCR10/POLR2J/CASP3/NDUFA2/APAF1/GNAQ/ATP5PD/COX5B/CLTB/DCTN2/UQCRHL/NDUFV2/SDHC/NDUFB9/POLR2F/IFT57/ATP5PO/TBPL1/NDUFB7/NDUFA7/PPARG
Primary immunodeficiency	Primary immunodeficiency	Primary immunodeficiency	29	-0.614262	-2.01586	6.98146e-05	6.98146e-05	0.000757502	2385	tags=62%, list=22%, signal=49%	TAP1/RFXAP/CD40/CD40LG/TAP2/CD19/CD3D/CD8B/CD79A/BLNK/CD8A/ADA/CD4/RFX5/CD3E/IL7R/ZAP70/LCK
Viral myocarditis	Viral myocarditis	Viral myocarditis	46	-0.532726	-1.9436	0.000105763	0.000105763	0.00106558	2448	tags=59%, list=23%, signal=46%	HLA-DQB1/HLA-E/CD40/CD40LG/EIF4G1/MYH9/HLA-DOB/HLA-A/HLA-B/DAG1/ITGAL/CD86/CASP8/HLA-F/RAC1/HLA-DQA1/PRF1/CD28/ABL1/HLA-DRA/HLA-DOA/HLA-DMA/HLA-DMB/FYN/HLA-DRB1/HLA-DPA1/HLA-DPB1
Cell adhesion molecules (CAMs)	Cell adhesion molecules (CAMs)	Cell adhesion molecules (CAMs)	84	-0.448618	-1.81205	0.000115119	0.000115119	0.00108252	2829	tags=46%, list=26%, signal=35%	ITGA6/HLA-C/HLA-DRB5/MPZL1/CTLA4/HLA-DQB1/HLA-E/CD40/CD22/CD40LG/PECAM1/HLA-DOB/PTPRM/HLA-A/HLA-B/ITGAL/CD8B/CD86/HLA-F/GLG1/CD8A/HLA-DQA1/CD99/ICAM2/CD28/CD4/ITGA4/HLA-DRA/F11R/ITGB7/CD2/HLA-DOA/CD6/HLA-DMA/HLA-DMB/SPN/HLA-DRB1/HLA-DPA1/HLA-DPB1
Complement and coagulation cascades	Complement and coagulation cascades	Complement and coagulation cascades	32	0.539675	2.00427	0.000242476	0.000242476	0.00213762	2686	tags=53%, list=25%, signal=40%	CR1/CD59/CD55/F8/F5/SERPINA1/F12/PROS1/C1QB/C3AR1/TFPI/C1QA/C4BPB/F2/C1QC/SERPIND1/PLAU
Cardiac muscle contraction	Cardiac muscle contraction	Cardiac muscle contraction	46	0.446181	1.84802	0.00110132	0.00110132	0.00913789	3006	tags=54%, list=28%, signal=39%	COX7B/COX7A2/UQCRQ/UQCR11/COX6A1/UQCRB/COX7C/COX6C/UQCR10/TPM4/COX5B/SLC9A6/UQCRHL/TPM1/COX6B1/UQCRFS1/COX6B2/COX7A2L/CACNG8/SLC8A1/CACNG5/CACNA1C/FXYD2/SLC9A1/ATP1B2
Starch and sucrose metabolism	Starch and sucrose metabolism	Starch and sucrose metabolism	19	0.59926	1.93389	0.00139223	0.00139223	0.0106515	1224	tags=53%, list=11%, signal=47%	HK3/PGM2/MGAM/PYGL/PGM1/GBE1/PGM2L1/HK2/UGP2/AGL
Natural killer cell mediated cytotoxicity	Natural killer cell mediated cytotoxicity	Natural killer cell mediated cytotoxicity	95	-0.395268	-1.62137	0.00143477	0.00143477	0.0106515	2943	tags=46%, list=27%, signal=34%	NFAT5/KLRC3/MICB/HLA-C/KLRC1/PRKCB/SOS1/PAK1/MAP2K1/PTPN6/HLA-E/MAPK1/PRKCA/GZMB/HCST/PIK3CD/HLA-A/HLA-B/LCP2/ITGAL/PIK3R1/FASLG/PIK3R5/SH2D1B/RAC1/KLRD1/NCR3/VAV2/TNFRSF10B/FCGR3A/NFATC1/SH2D1A/PRF1/ICAM2/PPP3CC/CD244/LAT/PLCG1/CD247/NFATC2/ZAP70/LCK/NFATC3/FYN
Asthma	Asthma	Asthma	19	-0.586306	-1.74158	0.00358848	0.00358848	0.0244058	677	tags=74%, list=6%, signal=69%	HLA-DRB5/HLA-DQB1/CD40/CD40LG/HLA-DOB/HLA-DQA1/FCER1A/HLA-DRA/HLA-DOA/HLA-DMA/HLA-DMB/HLA-DRB1/HLA-DPA1/HLA-DPB1
Citrate cycle (TCA cycle)	Citrate cycle (TCA cycle)	Citrate cycle (TCA cycle)	26	-0.553235	-1.77768	0.00363355	0.00363355	0.0244058	2619	tags=62%, list=24%, signal=47%	MDH1/SDHD/IDH2/IDH3G/DLAT/ACO1/FH/SDHA/SUCLG2/PDHB/IDH3B/IDH3A/DLST/ACLY/CS/MDH2
Systemic lupus erythematosus	Systemic lupus erythematosus	Systemic lupus erythematosus	37	-0.495381	-1.72254	0.00521882	0.00521882	0.0334604	870	tags=51%, list=8%, signal=47%	FCGR2B/HLA-DRB5/HLA-DQB1/CD40/CD40LG/HLA-DOB/CD86/FCGR3A/ACTN4/HLA-DQA1/CD28/SNRPB/HLA-DRA/HLA-DOA/HLA-DMA/HLA-DMB/HLA-DRB1/HLA-DPA1/HLA-DPB1
p53 signaling pathway	p53 signaling pathway	p53 signaling pathway	57	0.35921	1.53616	0.00557647	0.00557647	0.0341989	1945	tags=37%, list=18%, signal=30%	GADD45A/TP53I3/RCHY1/GADD45G/CCND3/COP1/THBS1/CASP3/APAF1/SESN2/CCNB2/CD82/PTEN/CCNE2/GADD45B/CCNB1/STEAP3/RRM2/CDK1/MDM2/CHEK1
O-Glycan biosynthesis	O-Glycan biosynthesis	O-Glycan biosynthesis	20	0.551009	1.80623	0.00600112	0.00600112	0.0352698	1982	tags=50%, list=18%, signal=41%	C1GALT1C1/GALNT3/GALNT14/GALNT2/B4GALT5/GCNT1/GALNT1/C1GALT1/ST3GAL2/GALNT16
Proteasome	Proteasome	Proteasome	39	0.412003	1.62865	0.00758921	0.00758921	0.0428191	2241	tags=44%, list=21%, signal=35%	POMP/PSMA2/PSMC6/PSMA4/PSME3/PSMC1/PSMD6/PSMD12/PSMC2/PSMA7/PSMA3/PSMB6/PSMD4/SEM1/PSMB5/PSMD13/PSMB1
B cell receptor signaling pathway	B cell receptor signaling pathway	B cell receptor signaling pathway	71	-0.385403	-1.52602	0.00790944	0.00790944	0.0429095	3319	tags=54%, list=31%, signal=37%	JUN/GRB2/AKT2/GSK3B/MALT1/FOS/PLCG2/NFKB1/NFAT5/FCGR2B/PRKCB/SOS1/MAP2K1/PTPN6/AKT3/RASGRP3/MAPK1/CD22/NFKBIE/CD72/CD19/PIK3CD/AKT1/RELA/PIK3R1/PIK3R5/INPP5D/CD79A/RAC1/VAV2/BLNK/NFATC1/CARD11/PPP3CC/IKBKB/CD81/NFATC2/NFATC3
Valine, leucine and isoleucine degradation	Valine, leucine and isoleucine degradation	Valine, leucine and isoleucine degradation	36	-0.473252	-1.63323	0.00976299	0.00976299	0.0510035	2617	tags=44%, list=24%, signal=34%	HADHB/ACADSB/ALDH2/IVD/HADHA/HSD17B10/BCAT2/ALDH3A2/MCCC1/HADH/ECHS1/HIBADH/PCCA/BCKDHB/MCCC2/ALDH9A1
beta-Alanine metabolism	beta-Alanine metabolism	beta-Alanine metabolism	15	-0.592354	-1.6757	0.0139831	0.0139831	0.0704413	2136	tags=53%, list=20%, signal=43%	ALDH2/MLYCD/HADHA/ALDH3A2/SRM/ECHS1/SMS/ALDH9A1
Notch signaling pathway	Notch signaling pathway	Notch signaling pathway	40	-0.447346	-1.58919	0.0145158	0.0145158	0.070603	2141	tags=32%, list=20%, signal=26%	DVL2/EP300/KAT2A/SNW1/MAML1/CREBBP/DVL1/HDAC1/MAML2/MFNG/NCOR2/LFNG/CTBP1
Glycerophospholipid metabolism	Glycerophospholipid metabolism	Glycerophospholipid metabolism	50	0.375106	1.5732	0.0153961	0.0153961	0.0723885	1672	tags=32%, list=15%, signal=27%	PGS1/MBOAT2/LPCAT2/AGPAT2/CRLS1/PCYT1A/GPAT3/PLD1/LPGAT1/PLA2G4A/GPAT4/CHPT1/LYPLA1/CHKA/MBOAT1/GPD2
Nicotinate and nicotinamide metabolism	Nicotinate and nicotinamide metabolism	Nicotinate and nicotinamide metabolism	17	0.522076	1.62796	0.0180617	0.0180617	0.0821823	1985	tags=53%, list=18%, signal=43%	BST1/NMRK1/NMNAT1/NMNAT2/NT5C3A/NADSYN1/NAMPT/NT5C2/NNMT
Glycosphingolipid biosynthesis - lacto and neolacto series	Glycosphingolipid biosynthesis - lacto and neolacto series	Glycosphingolipid biosynthesis - lacto and neolacto series	18	0.517891	1.6278	0.0191834	0.0191834	0.0845583	3097	tags=56%, list=29%, signal=40%	FUT7/ST3GAL4/B3GNT5/B4GALT4/FUT4/B3GNT2/FUT5/B4GALT2/FUT6/ST3GAL6
Wnt signaling pathway	Wnt signaling pathway	Wnt signaling pathway	101	-0.341456	-1.4126	0.0198282	0.0198282	0.084752	2253	tags=28%, list=21%, signal=22%	PRKCA/DVL2/CSNK2B/PPP2R1A/EP300/PRKACB/CAMK2G/TP53/CSNK2A2/PPP2R5E/RAC1/CREBBP/DVL1/PPP2R5C/PRKX/NFATC1/CUL1/PPP3CC/CAMK2D/CCND2/RUVBL1/CTBP1/NFATC2/LEF1/NFATC3/TCF7/MYC/SMAD3
Regulation of autophagy	Regulation of autophagy	Regulation of autophagy	17	0.509605	1.58908	0.0248614	0.0248614	0.10314	2003	tags=59%, list=18%, signal=48%	ATG3/GABARAPL2/ATG4A/PRKAA1/ATG7/ATG5/ATG4D/PIK3C3/GABARAP/ULK1
Cysteine and methionine metabolism	Cysteine and methionine metabolism	Cysteine and methionine metabolism	23	-0.497216	-1.54147	0.0265056	0.0265056	0.10682	3148	tags=65%, list=29%, signal=46%	ADI1/GOT1/DNMT3A/MAT2B/AMD1/MAT2A/ENOPH1/AHCYL2/SRM/AHCYL1/SMS/GOT2/LDHB/MTR/DNMT1
Hematopoietic cell lineage	Hematopoietic cell lineage	Hematopoietic cell lineage	62	-0.374396	-1.44337	0.0288198	0.0288198	0.11292	2221	tags=39%, list=20%, signal=31%	CD33/CD22/CD37/CD1C/CD19/MME/CD3D/CD8B/CD1D/CSF1R/CD7/CD8A/MS4A1/CD3G/FLT3LG/IL11RA/CD4/ITGA4/HLA-DRA/CD2/CD3E/IL7R/CD5/HLA-DRB1
RNA degradation	RNA degradation	RNA degradation	53	-0.387155	-1.45063	0.0355191	0.0355191	0.135274	3001	tags=49%, list=28%, signal=36%	PATL1/PNPT1/ZCCHC7/WDR61/MTREX/DCP1B/EXOSC8/CNOT9/EXOSC2/CNOT1/CNOT10/EXOSC7/HSPD1/CNOT6L/DCPS/LSM4/EDC4/EXOSC9/CNOT2/DDX6/CNOT7/EXOSC6/PARN/TTC37/HSPA9/EXOSC10
Butanoate metabolism	Butanoate metabolism	Butanoate metabolism	21	-0.499267	-1.53499	0.0364431	0.0364431	0.135274	2364	tags=38%, list=22%, signal=30%	AACS/ALDH2/HADHA/PDHB/ALDH3A2/HADH/ECHS1/ALDH9A1
Pyruvate metabolism	Pyruvate metabolism	Pyruvate metabolism	28	-0.45683	-1.48109	0.0376422	0.0376422	0.136142	2797	tags=50%, list=26%, signal=37%	ACACA/MDH1/GRHPR/ALDH2/GLO1/DLAT/ACYP1/PDHB/ALDH3A2/MDH2/LDHB/AKR1B1/ACSS1/ALDH9A1

## Sheet: DPP4 
	ID	Description	setSize	enrichmentScore	NES	pvalue	p.adjust	qvalue	rank	leading_edge	core_enrichment
Ribosome	Ribosome	Ribosome	61	0.712283	2.72393	1e-10	1e-10	6.89474e-09	1346	tags=57%, list=12%, signal=51%	RPL14/RPL10A/RPL18/RPS4X/RPL19/RPS28/RPS19/RPL29/RPS27A/RPS25/RPS5/RPL22/RPL37A/RPS3/RPL32/RPS23/RPS15/RPL12/RPS6/RPL37/RPL8/RPS18/RPL38/RPL6/RPL15/RPS21/RPLP0/RPLP1/RPL36/RPL24/RPS29/RPL11/RPL35/RPL30/RPL36AL
Spliceosome	Spliceosome	Spliceosome	115	0.568162	2.4095	1e-10	1e-10	6.89474e-09	3035	tags=66%, list=28%, signal=48%	HNRNPA1/HNRNPA3/SNU13/PRPF19/THOC1/NCBP2/SF3A3/SNRPA1/TCERG1/U2AF2/PPIH/PPIE/SRSF6/SRSF7/PUF60/PRPF8/DDX5/HNRNPA1L2/SRSF5/SNRPC/HNRNPU/SRSF10/SNRPF/SNRNP200/SNRNP70/THOC2/SRSF3/WBP11/DHX15/TRA2B/PRPF4/DDX46/SNRPB/HNRNPC/LSM4/SNRPD2/PRPF31/TRA2A/SRSF4/EIF4A3/SRSF1/RBM25/CHERP/USP39/SNRPA/SF3A1/CCDC12/RBM22/SNW1/BCAS2/SNRNP40/RBM17/LSM7/SF3B3/ACIN1/SF3B2/SF3B5/ALYREF/PRPF6/SF3B1/NCBP1/HNRNPK/PPIL1/…
Complement and coagulation cascades	Complement and coagulation cascades	Complement and coagulation cascades	32	-0.575654	-2.33624	2.83499e-06	2.83499e-06	0.00013031	1756	tags=53%, list=16%, signal=45%	SERPINE1/SERPIND1/CFB/F2/C4BPB/PROS1/C1QB/F5/TFPI/F8/C1QA/C3AR1/SERPINA1/F12/CR1/CD55/CD59
Graft-versus-host disease	Graft-versus-host disease	Graft-versus-host disease	28	0.651684	2.1363	1.75748e-05	1.75748e-05	0.000508561	2035	tags=61%, list=19%, signal=49%	CD28/HLA-DPB1/HLA-DPA1/HLA-DMB/HLA-DOA/HLA-DRB1/HLA-DMA/PRF1/HLA-DRA/HLA-DQA1/KLRD1/GZMB/FASLG/HLA-DOB/KLRC1/CD86/HLA-F
Antigen processing and presentation	Antigen processing and presentation	Antigen processing and presentation	51	0.550856	2.06373	1.84402e-05	1.84402e-05	0.000508561	2411	tags=51%, list=22%, signal=40%	CD8A/RFX5/HLA-DPB1/HLA-DPA1/CD74/HLA-DMB/HLA-DOA/HLA-DRB1/HLA-DMA/CD8B/HLA-DRA/HLA-DQA1/CD4/HSP90AB1/PDIA3/KLRD1/PSME1/CREB1/RFXAP/CANX/HLA-DOB/KLRC1/HLA-F/CTSS/KLRC3/TAP2
Primary immunodeficiency	Primary immunodeficiency	Primary immunodeficiency	29	0.624891	2.07178	3.5315e-05	3.5315e-05	0.000811624	2486	tags=66%, list=23%, signal=51%	LCK/IL7R/CD3E/ZAP70/CD3D/CD8A/RFX5/ADA/CD8B/CD4/CD40LG/BLNK/RFXAP/ICOS/CD79A/CD40/CD19/TAP2/DCLRE1C
Type I diabetes mellitus	Type I diabetes mellitus	Type I diabetes mellitus	29	0.619808	2.05493	4.91971e-05	4.91971e-05	0.000890667	2035	tags=55%, list=19%, signal=45%	CD28/HLA-DPB1/HLA-DPA1/HLA-DMB/HLA-DOA/HLA-DRB1/HLA-DMA/HSPD1/PRF1/HLA-DRA/HLA-DQA1/GZMB/FASLG/HLA-DOB/CD86/HLA-F
RNA degradation	RNA degradation	RNA degradation	53	0.521561	1.96245	5.41806e-05	5.41806e-05	0.000890667	2246	tags=45%, list=21%, signal=36%	CNOT7/EXOSC10/HSPA9/TTC37/EXOSC8/HSPD1/EXOSC9/EXOSC7/CNOT9/DDX6/EDC4/CNOT2/EXOSC6/EXOSC2/WDR61/LSM4/PARN/CNOT6L/DCPS/MTREX/LSM7/ZCCHC7/EXOSC1/CNOT10
Intestinal immune network for IgA production	Intestinal immune network for IgA production	Intestinal immune network for IgA production	33	0.60154	2.0542	6.18956e-05	6.18956e-05	0.000890667	1916	tags=52%, list=18%, signal=43%	CD28/ITGB7/HLA-DPB1/HLA-DPA1/HLA-DMB/HLA-DOA/ITGA4/HLA-DRB1/HLA-DMA/HLA-DRA/HLA-DQA1/MAP3K14/CD40LG/CXCR4/ICOS/HLA-DOB/CD86
Autoimmune thyroid disease	Autoimmune thyroid disease	Autoimmune thyroid disease	27	0.640033	2.08849	6.45903e-05	6.45903e-05	0.000890667	2283	tags=67%, list=21%, signal=53%	CD28/HLA-DPB1/HLA-DPA1/HLA-DMB/HLA-DOA/HLA-DRB1/HLA-DMA/PRF1/HLA-DRA/HLA-DQA1/CD40LG/GZMB/FASLG/HLA-DOB/CTLA4/CD86/HLA-F/CD40
T cell receptor signaling pathway	T cell receptor signaling pathway	T cell receptor signaling pathway	96	0.452431	1.87117	8.29535e-05	8.29535e-05	0.0010399	2615	tags=41%, list=24%, signal=31%	RASGRP1/ITK/PRKCQ/LCK/CD3G/CD3E/LAT/CD28/ZAP70/CD3D/NFATC2/CD247/PLCG1/PPP3CC/CD8A/FYN/NFATC3/CBLB/IKBKB/PIK3R1/CARD11/CD8B/CD4/MAP3K14/CD40LG/NFATC1/ICOS/SOS1/CTLA4/AKT3/PIK3CD/PAK1/NFKBIE/PIK3R5/LCP2/AKT1/RELA/VAV2/MALT1
Glycosphingolipid biosynthesis - lacto and neolacto series	Glycosphingolipid biosynthesis - lacto and neolacto series	Glycosphingolipid biosynthesis - lacto and neolacto series	18	-0.643141	-2.18332	9.18542e-05	9.18542e-05	0.00105552	1974	tags=56%, list=18%, signal=46%	FUT6/FUT5/B3GNT2/B3GALT5/B4GALT2/FUT4/ST3GAL4/FUT7/B3GNT5/B4GALT4
Allograft rejection	Allograft rejection	Allograft rejection	27	0.627528	2.04769	0.000135964	0.000135964	0.00144221	2283	tags=63%, list=21%, signal=50%	CD28/HLA-DPB1/HLA-DPA1/HLA-DMB/HLA-DOA/HLA-DRB1/HLA-DMA/PRF1/HLA-DRA/HLA-DQA1/CD40LG/GZMB/FASLG/HLA-DOB/CD86/HLA-F/CD40
Citrate cycle (TCA cycle)	Citrate cycle (TCA cycle)	Citrate cycle (TCA cycle)	26	0.587926	1.90003	0.000870463	0.000870463	0.00857374	2114	tags=54%, list=19%, signal=43%	MDH2/IDH3A/SUCLG2/MDH1/CS/PDHB/DLAT/DLST/IDH3B/ACO1/FH/ACLY/SDHA/IDH2
Viral myocarditis	Viral myocarditis	Viral myocarditis	46	0.499508	1.83784	0.00100004	0.00100004	0.00919337	2447	tags=50%, list=23%, signal=39%	CD28/FYN/HLA-DPB1/HLA-DPA1/HLA-DMB/HLA-DOA/HLA-DRB1/HLA-DMA/PRF1/HLA-DRA/HLA-DQA1/CD40LG/ITGAL/ABL1/HLA-DOB/CD86/HLA-F/CYCS/EIF4G2/CASP8/CD40/RAC1/DAG1
Natural killer cell mediated cytotoxicity	Natural killer cell mediated cytotoxicity	Natural killer cell mediated cytotoxicity	95	0.405062	1.67164	0.0011438	0.0011438	0.00985776	2392	tags=36%, list=22%, signal=28%	LCK/LAT/ZAP70/NFATC2/CD247/PLCG1/PPP3CC/SH2D1A/FYN/NFATC3/CD244/ICAM2/PIK3R1/PRF1/TNFRSF10B/PRKCA/KLRD1/HCST/ITGAL/FCGR3A/GZMB/SH2D1B/NFATC1/FASLG/NCR3/KLRC1/SOS1/PIK3CD/CD48/PAK1/PIK3R5/KLRC3/LCP2/RAC1
Cell adhesion molecules (CAMs)	Cell adhesion molecules (CAMs)	Cell adhesion molecules (CAMs)	84	0.415656	1.6805	0.0012963	0.0012963	0.0103397	2050	tags=36%, list=19%, signal=29%	CD6/CD2/CD28/ITGB7/CD8A/SPN/HLA-DPB1/HLA-DPA1/HLA-DMB/HLA-DOA/ITGA4/HLA-DRB1/ICAM2/HLA-DMA/ITGA6/CD8B/HLA-DRA/HLA-DQA1/CD4/CD99/CD40LG/GLG1/ITGAL/PTPRM/ICOS/HLA-DOB/CTLA4/CD86/HLA-F/F11R
Neuroactive ligand-receptor interaction	Neuroactive ligand-receptor interaction	Neuroactive ligand-receptor interaction	88	-0.316082	-1.67356	0.00134969	0.00134969	0.0103397	3989	tags=68%, list=37%, signal=43%	HTR7/TBXA2R/PTGFR/CHRNB1/APLNR/GRIN2C/ADORA2B/CHRNA10/GABBR1/GLP2R/KISS1R/GRIN1/CHRNA3/P2RX3/VIPR2/THRB/GH2/GABBR2/SSTR4/GHRHR/VIPR1/GCGR/FPR2/GPR35/UTS2R/LHB/GALR3/HRH3/CHRNB2/ADRA1A/CHRND/PARD3/CHRNA4/GRM4/ADRB3/GRIK5/ADRA2C/GABRA3/MCHR1/FSHR/F2RL3/MC2R/P2RY13/F2/ADCYAP1R1/OPRL1/ADRA2B/CHRNG/NTSR1/C3AR1/S1PR4/HRH2/FPR1/CHRNA2/PRL/OPRD1/EDNRB/P2RX1/TSPO/LTB4R
O-Glycan biosynthesis	O-Glycan biosynthesis	O-Glycan biosynthesis	20	-0.52895	-1.87112	0.00263882	0.00263882	0.0191516	3363	tags=75%, list=31%, signal=52%	GCNT3/GALNT18/ST6GALNAC1/GALNT1/GALNT16/B3GNT6/C1GALT1/ST3GAL2/GALNT3/GALNT9/GALNT14/GALNT2/C1GALT1C1/GCNT1/B4GALT5
PPAR signaling pathway	PPAR signaling pathway	PPAR signaling pathway	37	-0.392573	-1.68744	0.00382993	0.00382993	0.0259846	2488	tags=41%, list=23%, signal=31%	ACOX2/APOA1/LPL/DBI/SCD5/ACOX1/PLTP/ACAA1/CPT2/ILK/ACSL3/PPARG/GK/ACSL4/ACSL1
Starch and sucrose metabolism	Starch and sucrose metabolism	Starch and sucrose metabolism	19	-0.522082	-1.80131	0.0039572	0.0039572	0.0259846	1030	tags=42%, list=9%, signal=38%	PYGL/HK2/PGM1/PGM2L1/PGM2/MGAM/GBE1/HK3
Asthma	Asthma	Asthma	19	0.597421	1.78917	0.00454305	0.00454305	0.0269596	1153	tags=53%, list=11%, signal=47%	FCER1A/HLA-DPB1/HLA-DPA1/HLA-DMB/HLA-DOA/HLA-DRB1/HLA-DMA/HLA-DRA/HLA-DQA1/CD40LG
Purine metabolism	Purine metabolism	Purine metabolism	106	0.379061	1.58962	0.00481994	0.00481994	0.0269596	2694	tags=37%, list=25%, signal=28%	FHIT/ATIC/IMPDH2/PRPS1/POLR1B/POLR1E/PAICS/ADA/APRT/POLE3/POLD2/POLR1C/NT5E/ADSL/NME3/PDE7A/POLR2H/NUDT9/PPAT/ITPA/PRIM1/RRM1/GMPS/POLR2B/AMPD2/ADCY7/ADK/POLR3B/GART/POLR3K/PDE4B/POLR2D/PRPS2/POLR2I/ADPRM/POLR2G/NME7/POLA1/POLR2C
Systemic lupus erythematosus	Systemic lupus erythematosus	Systemic lupus erythematosus	37	0.476449	1.66946	0.00482753	0.00482753	0.0269596	1916	tags=41%, list=18%, signal=34%	CD28/HLA-DPB1/HLA-DPA1/HLA-DMB/HLA-DOA/HLA-DRB1/HLA-DMA/HLA-DRA/HLA-DQA1/CD40LG/SNRPB/FCGR3A/HLA-DOB/SSB/CD86
Hematopoietic cell lineage	Hematopoietic cell lineage	Hematopoietic cell lineage	62	0.432396	1.66336	0.00488771	0.00488771	0.0269596	936	tags=27%, list=9%, signal=25%	CD5/CD3G/IL7R/FLT3LG/CD3E/CD2/CD3D/CD8A/IL11RA/ITGA4/HLA-DRB1/CD7/ITGA6/MS4A1/CD8B/HLA-DRA/CD4
Regulation of autophagy	Regulation of autophagy	Regulation of autophagy	17	-0.515905	-1.71699	0.00566294	0.00566294	0.0296458	1650	tags=47%, list=15%, signal=40%	ATG7/PRKAA1/GABARAPL1/ULK1/GABARAP/ATG4A/GABARAPL2/ATG4D
DNA replication	DNA replication	DNA replication	32	0.495218	1.67733	0.00580468	0.00580468	0.0296458	3875	tags=69%, list=36%, signal=44%	RNASEH2B/POLE3/POLD2/RPA1/MCM7/PRIM1/RPA2/SSBP1/RFC5/PCNA/MCM6/RNASEH1/POLA1/RFC4/RFC1/RNASEH2A/RFC3/MCM4/LIG1/POLE/FEN1/RNASEH2C
Pyruvate metabolism	Pyruvate metabolism	Pyruvate metabolism	28	0.509368	1.66977	0.00838932	0.00838932	0.0413158	1713	tags=39%, list=16%, signal=33%	LDHB/ACSS1/AKR1B1/ALDH9A1/MDH2/ACYP1/MDH1/PDHB/DLAT/GLO1/ALDH3A2
N-Glycan biosynthesis	N-Glycan biosynthesis	N-Glycan biosynthesis	38	0.4578	1.61145	0.0107416	0.0107416	0.0510763	3193	tags=53%, list=29%, signal=37%	ST6GAL1/GANAB/DDOST/ALG8/MAN2A1/RPN2/ALG2/STT3A/MAN1B1/STT3B/DAD1/ALG5/FUT8/DPAGT1/MGAT2/MGAT4A/ALG3/MAN1C1/MOGS/ALG9
RNA polymerase	RNA polymerase	RNA polymerase	23	0.531894	1.66782	0.01252	0.01252	0.0575479	2694	tags=48%, list=25%, signal=36%	POLR1B/POLR1E/POLR1C/POLR2H/POLR2B/POLR3B/POLR3K/POLR2D/POLR2I/POLR2G/POLR2C
Regulation of actin cytoskeleton	Regulation of actin cytoskeleton	Regulation of actin cytoskeleton	141	-0.230142	-1.34596	0.0139686	0.0139686	0.0621353	2401	tags=36%, list=22%, signal=29%	EGF/ARHGEF4/ROCK1/PAK6/GIT1/EGFR/ARPC1B/PIK3CA/PFN3/BCAR1/PDGFB/MAP2K2/MYLPF/PIK3R2/NCKAP1/ITGB5/ITGB3/LIMK1/CFL1/ITGB4/CRK/PPP1R12A/FGFR1/F2/NCKAP1L/ARPC5/PIP5K1A/RAC3/APC/MYL9/ITGA2B/PPP1CB/SSH1/FGF11/PIK3CB/SSH3/MAPK3/BAIAP2/FGF13/ITGA7/CDC42/ARPC3/PDGFC/LIMK2/SOS2/ARPC2/GSN/ITGAM/MYL12B/ARPC1A/MYL12A
Cysteine and methionine metabolism	Cysteine and methionine metabolism	Cysteine and methionine metabolism	23	0.516738	1.6203	0.0194637	0.0194637	0.083873	2898	tags=61%, list=27%, signal=45%	LDHB/DNMT1/MTR/GOT2/SRM/ENOPH1/SMS/MAT2A/AHCYL2/AHCYL1/AMD1/ADI1/MAT2B/TRDMT1
Galactose metabolism	Galactose metabolism	Galactose metabolism	18	-0.4561	-1.54836	0.0244599	0.0244599	0.100851	1117	tags=44%, list=10%, signal=40%	GALK1/HK2/B4GALT2/PGM1/GLA/PGM2/MGAM/HK3
ECM-receptor interaction	ECM-receptor interaction	ECM-receptor interaction	38	-0.340365	-1.47826	0.0248662	0.0248662	0.100851	3515	tags=66%, list=32%, signal=45%	LAMA5/COL6A2/ITGA10/GP6/COL6A3/VWF/GP1BA/LAMC2/HSPG2/COL4A6/GP9/ITGB5/LAMB4/ITGB3/HMMR/THBS3/ITGB4/TNR/COL11A2/LAMC1/SDC4/ITGA2B/COL5A1/ITGA7/THBS1
Melanoma	Melanoma	Melanoma	43	-0.340029	-1.50757	0.0273049	0.0273049	0.106361	2401	tags=47%, list=22%, signal=36%	EGF/EGFR/PIK3CA/PDGFB/E2F2/MAP2K2/RB1/PIK3R2/BAD/FGFR1/E2F1/FGF11/PIK3CB/MAPK3/FGF13/PDGFC/PTEN/MDM2/E2F3/HGF
Olfactory transduction	Olfactory transduction	Olfactory transduction	36	-0.344692	-1.45581	0.0283948	0.0283948	0.106361	3454	tags=72%, list=32%, signal=49%	OR2T34/CAMK2A/OR56A4/OR13H1/OR10A4/OR14I1/CALML6/GUCY2D/OR51E1/OR9K2/OR1L1/GUCA1A/OR7D4/OR2A14/OR2A2/OR1N2/OR2T6/ADCY3/OR5A2/CALML3/OR51D1/CAMK2B/OR52R1/PDE1C/OR1N1/ARRB2
Wnt signaling pathway	Wnt signaling pathway	Wnt signaling pathway	101	0.344904	1.43101	0.0285388	0.0285388	0.106361	1095	tags=18%, list=10%, signal=16%	LEF1/TCF7/CCND2/SMAD3/NFATC2/MYC/PPP3CC/PRKX/PRKACB/CAMK2D/NFATC3/RUVBL1/CUL1/CTBP1/PPP2R5E/PRKCA/DVL1/PPP2R5C
One carbon pool by folate	One carbon pool by folate	One carbon pool by folate	12	0.588238	1.55801	0.0303892	0.0303892	0.107646	2288	tags=50%, list=21%, signal=40%	ATIC/MTR/MTHFD1/SHMT2/GART/MTHFR
Pyrimidine metabolism	Pyrimidine metabolism	Pyrimidine metabolism	77	0.359694	1.4336	0.030445	0.030445	0.107646	2694	tags=38%, list=25%, signal=29%	DCTD/POLR1B/POLR1E/POLE3/UMPS/POLD2/POLR1C/NT5E/NME3/POLR2H/ITPA/PRIM1/RRM1/POLR2B/UCKL1/POLR3B/DUT/POLR3K/CAD/UPRT/POLR2D/AK3/POLR2I/CTPS1/POLR2G/NME7/CMPK1/POLA1/POLR2C
Valine, leucine and isoleucine degradation	Valine, leucine and isoleucine degradation	Valine, leucine and isoleucine degradation	36	0.430629	1.49698	0.0369031	0.0369031	0.126396	2872	tags=42%, list=26%, signal=31%	BCKDHB/MCCC1/HADH/MCCC2/PCCA/ALDH9A1/HIBADH/BCAT2/ECHS1/ACADSB/ALDH3A2/HSD17B10/IVD/ALDH6A1/HADHA
Cardiac muscle contraction	Cardiac muscle contraction	Cardiac muscle contraction	46	-0.318781	-1.44438	0.0375811	0.0375811	0.126396	3814	tags=57%, list=35%, signal=37%	UQCRQ/UQCRC1/CACNG4/COX7A2L/COX6A2/COX6A1/SLC9A6/CACNG6/CACNB2/SLC9A1/ATP1B2/CACNB1/FXYD2/UQCRB/CACNG5/CACNG7/ATP1A3/CACNA1C/COX7A2/CACNG8/TPM1/SLC8A1/UQCR11/COX6B2/COX7B/TPM4
Aminoacyl-tRNA biosynthesis	Aminoacyl-tRNA biosynthesis	Aminoacyl-tRNA biosynthesis	15	0.540589	1.53017	0.0434132	0.0434132	0.142534	3337	tags=67%, list=31%, signal=46%	AARS2/FARS2/YARS2/NARS2/VARS2/FARSA/SEPSECS/FARSB/HARS2/IARS2

## Sheet: Sheet1
TXN	DPP4						TXN	DPP4
Oxidative phosphorylation	Ribosome	0					Oxidative phosphorylation	Ribosome	0
Spliceosome	Spliceosome	1					Spliceosome	Spliceosome	1
Antigen processing and presentation	Complement and coagulation cascades	1					Antigen processing and presentation	Complement and coagulation cascades	1
Graft-versus-host disease	Graft-versus-host disease	1					Graft-versus-host disease	Graft-versus-host disease	1
Alzheimer's disease	Antigen processing and presentation	0					Alzheimer's disease	Antigen processing and presentation	1
Parkinson's disease	Primary immunodeficiency	0					Parkinson's disease	Primary immunodeficiency	1
Autoimmune thyroid disease	Type I diabetes mellitus	1					Autoimmune thyroid disease	Type I diabetes mellitus	1
Allograft rejection	RNA degradation	1					Allograft rejection	RNA degradation	1
Type I diabetes mellitus	Intestinal immune network for IgA production	1					Type I diabetes mellitus	Intestinal immune network for IgA production	1
T cell receptor signaling pathway	Autoimmune thyroid disease	1					T cell receptor signaling pathway	Autoimmune thyroid disease	1
Intestinal immune network for IgA production	T cell receptor signaling pathway	1					Intestinal immune network for IgA production	T cell receptor signaling pathway	1
Huntington's disease	Glycosphingolipid biosynthesis - lacto and neolacto series	0					Huntington's disease	Glycosphingolipid biosynthesis - lacto and neolacto series	1
Primary immunodeficiency	Allograft rejection	1					Primary immunodeficiency	Allograft rejection	1
Viral myocarditis	Citrate cycle (TCA cycle)	1					Viral myocarditis	Citrate cycle (TCA cycle)	1
Cell adhesion molecules (CAMs)	Viral myocarditis	1					Cell adhesion molecules (CAMs)	Viral myocarditis	1
Complement and coagulation cascades	Natural killer cell mediated cytotoxicity	1					Complement and coagulation cascades	Natural killer cell mediated cytotoxicity	1
Cardiac muscle contraction	Cell adhesion molecules (CAMs)	1					Cardiac muscle contraction	Cell adhesion molecules (CAMs)	1
Starch and sucrose metabolism	Neuroactive ligand-receptor interaction	1					Starch and sucrose metabolism	Neuroactive ligand-receptor interaction	0
Natural killer cell mediated cytotoxicity	O-Glycan biosynthesis	1					Natural killer cell mediated cytotoxicity	O-Glycan biosynthesis	1
Asthma	PPAR signaling pathway	1					Asthma	PPAR signaling pathway	0
Citrate cycle (TCA cycle)	Starch and sucrose metabolism	1					Citrate cycle (TCA cycle)	Starch and sucrose metabolism	1
Systemic lupus erythematosus	Asthma	1					Systemic lupus erythematosus	Asthma	1
p53 signaling pathway	Purine metabolism	0					p53 signaling pathway	Purine metabolism	0
O-Glycan biosynthesis	Systemic lupus erythematosus	1					O-Glycan biosynthesis	Systemic lupus erythematosus	1
Proteasome	Hematopoietic cell lineage	0					Proteasome	Hematopoietic cell lineage	1
B cell receptor signaling pathway	Regulation of autophagy	0					B cell receptor signaling pathway	Regulation of autophagy	1
Valine, leucine and isoleucine degradation	DNA replication	1					Valine, leucine and isoleucine degradation	DNA replication	0
beta-Alanine metabolism	Pyruvate metabolism	0					beta-Alanine metabolism	Pyruvate metabolism	1
Notch signaling pathway	N-Glycan biosynthesis	0					Notch signaling pathway	N-Glycan biosynthesis	0
Glycerophospholipid metabolism	RNA polymerase	0					Glycerophospholipid metabolism	RNA polymerase	0
Nicotinate and nicotinamide metabolism	Regulation of actin cytoskeleton	0					Nicotinate and nicotinamide metabolism	Regulation of actin cytoskeleton	0
Glycosphingolipid biosynthesis - lacto and neolacto series	Cysteine and methionine metabolism	1					Glycosphingolipid biosynthesis - lacto and neolacto series	Cysteine and methionine metabolism	1
Wnt signaling pathway	Galactose metabolism	1					Wnt signaling pathway	Galactose metabolism	0
Regulation of autophagy	ECM-receptor interaction	1					Regulation of autophagy	ECM-receptor interaction	0
Cysteine and methionine metabolism	Melanoma	1					Cysteine and methionine metabolism	Melanoma	0
Hematopoietic cell lineage	Olfactory transduction	1					Hematopoietic cell lineage	Olfactory transduction	0
RNA degradation	Wnt signaling pathway	1					RNA degradation	Wnt signaling pathway	1
Butanoate metabolism	One carbon pool by folate	0					Butanoate metabolism	One carbon pool by folate	0
Pyruvate metabolism	Pyrimidine metabolism	1					Pyruvate metabolism	Pyrimidine metabolism	0
	Valine, leucine and isoleucine degradation							Valine, leucine and isoleucine degradation	1
	Cardiac muscle contraction							Cardiac muscle contraction	1
	Aminoacyl-tRNA biosynthesis							Aminoacyl-tRNA biosynthesis	0
